# Supplementary material
Source: PubMed Central journal article supplement (PMC6726470)

# Supplementary Figure 2

## 1000 Genomes, PC2 vs. PC1

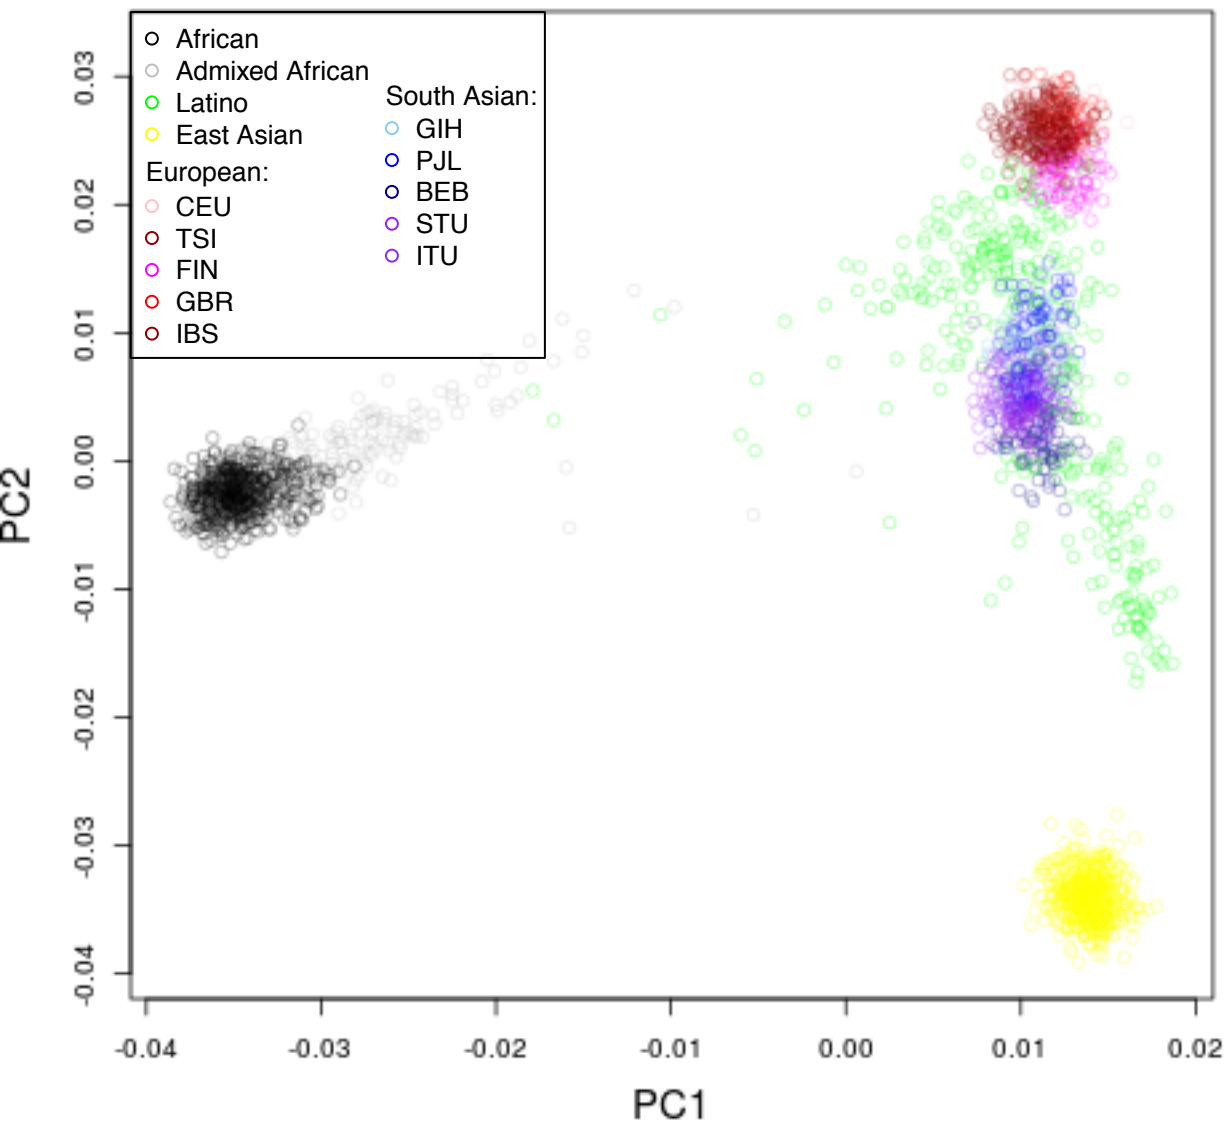

## DDD projected onto 1000 Genomes, PC2 vs. PC1

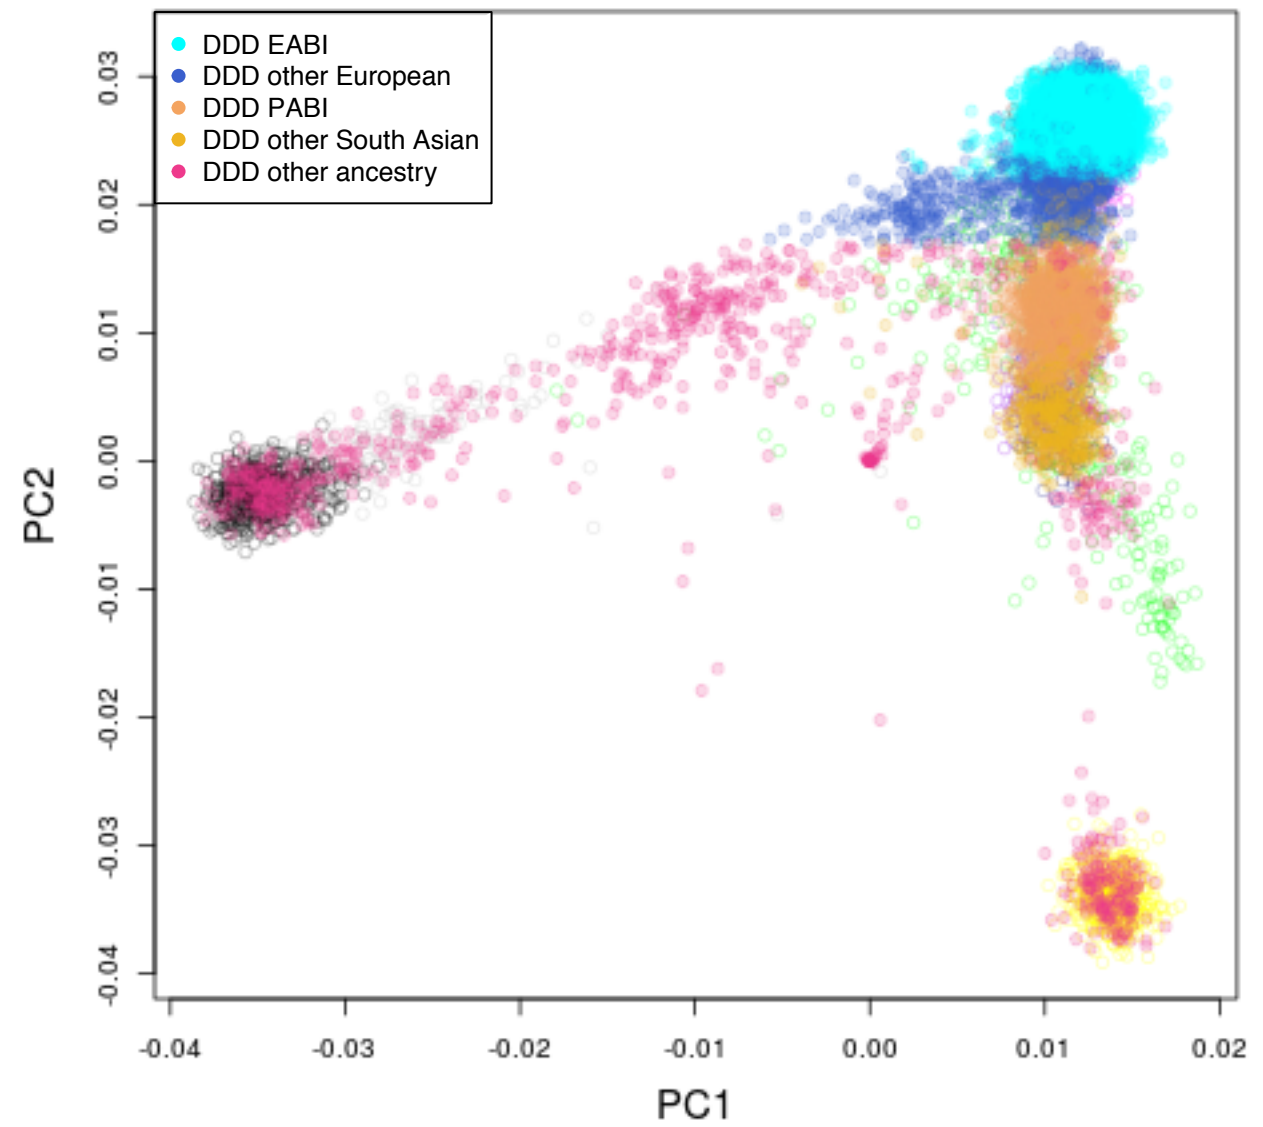

## 1000 Genomes, PC3 vs. PC2

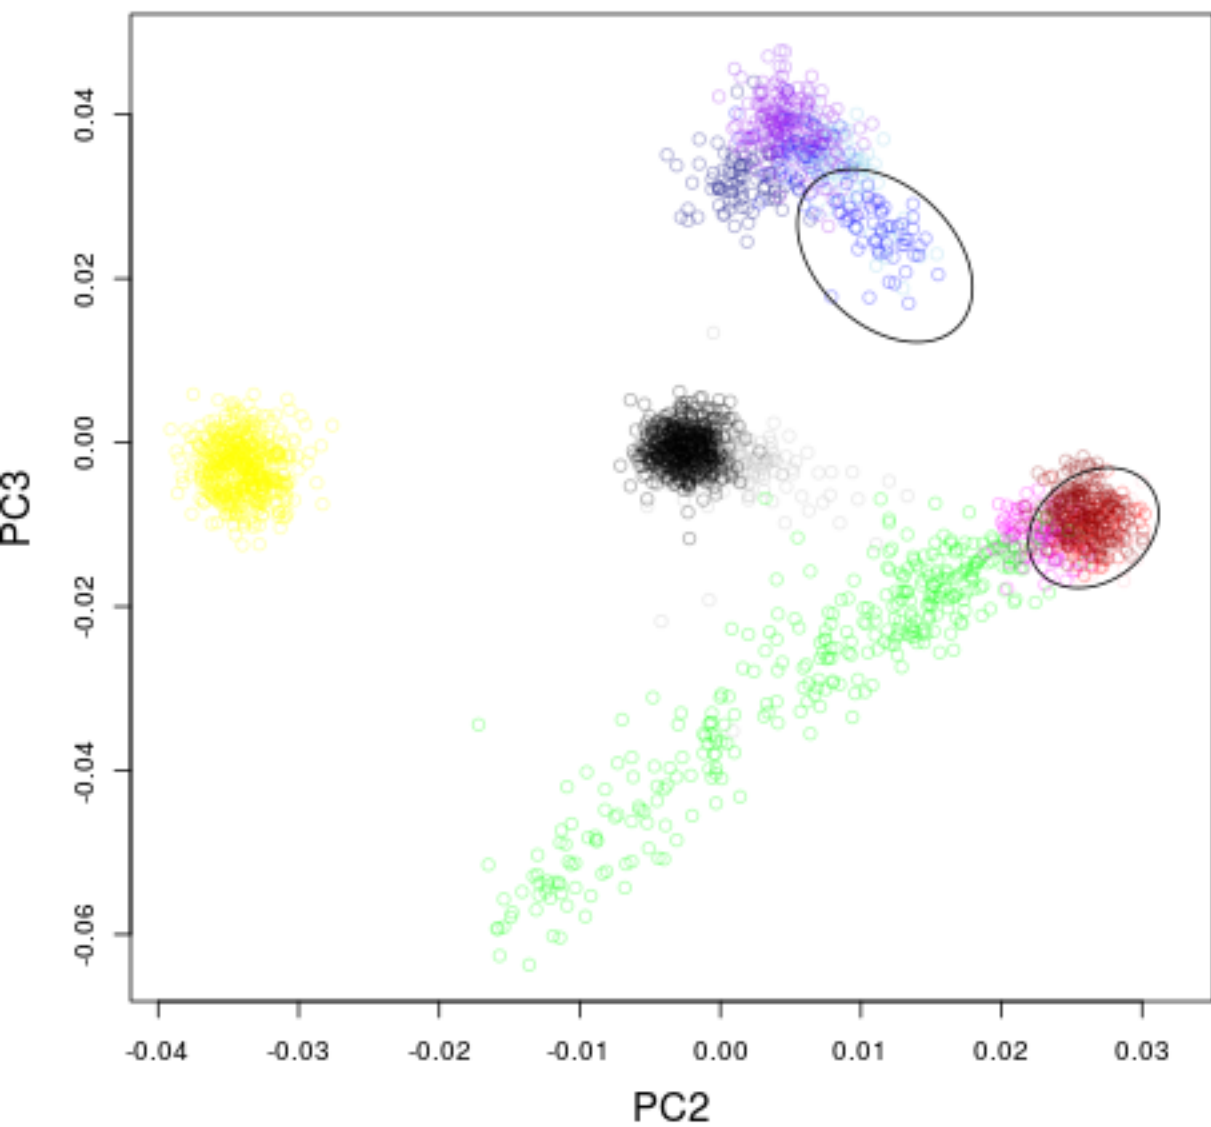

## DDD projected onto 1000 Genomes, PC3 vs. PC2

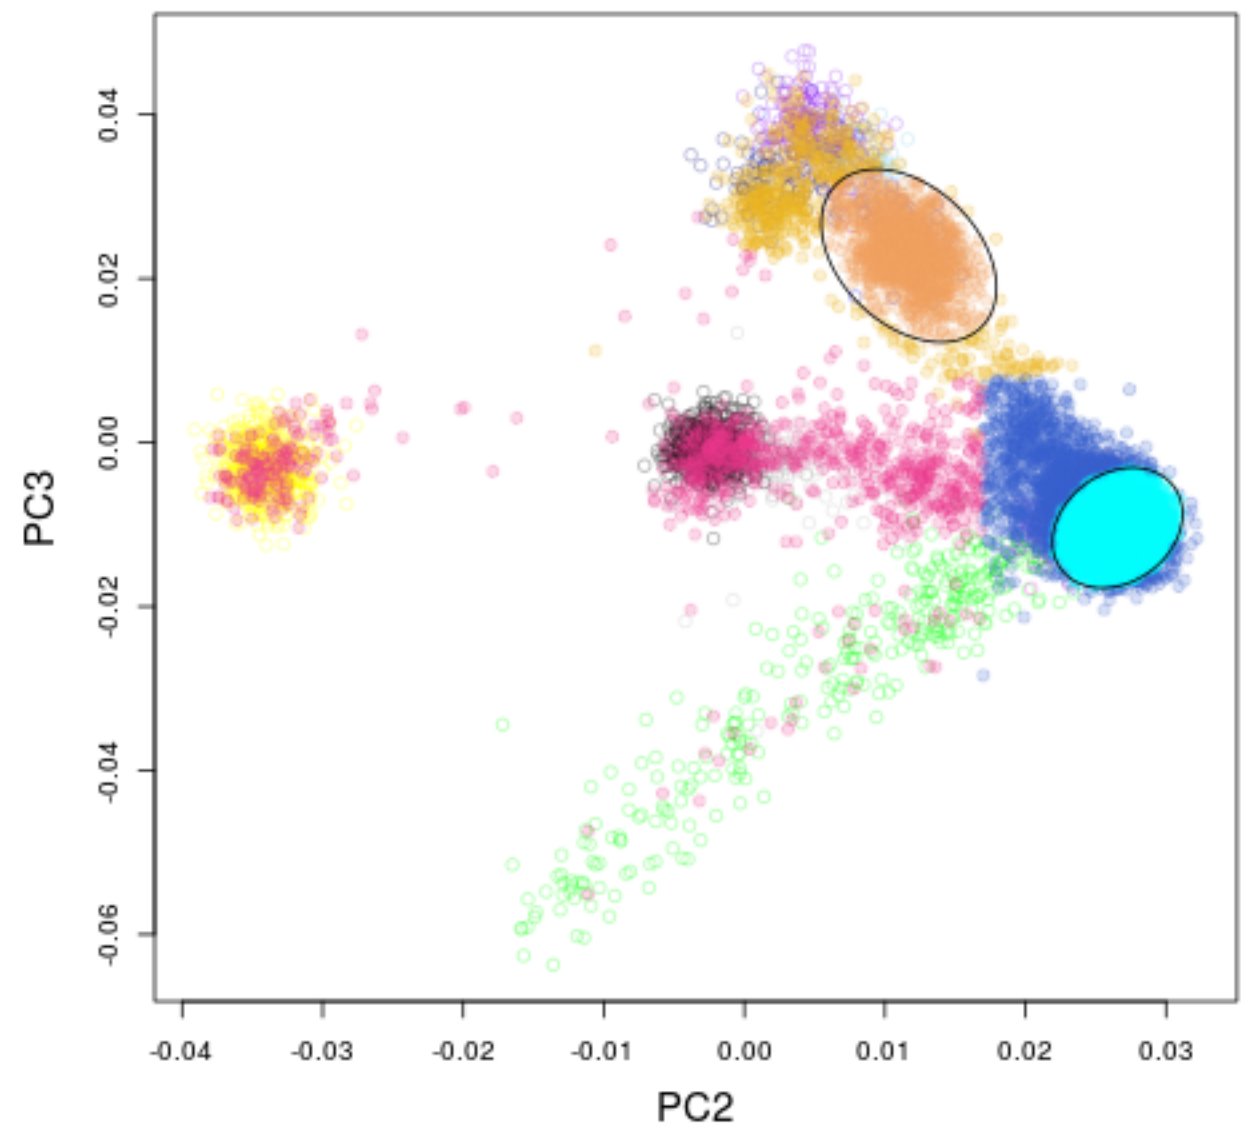

Supplement: EMS84140-supplement-Supp_Figure_2.pdf [file EMS84140-supplement-Supp_Figure_2.pdf]
