# Supplementary material
Source: PubMed Central journal article supplement (PMC6726470)

## Number of SNPs

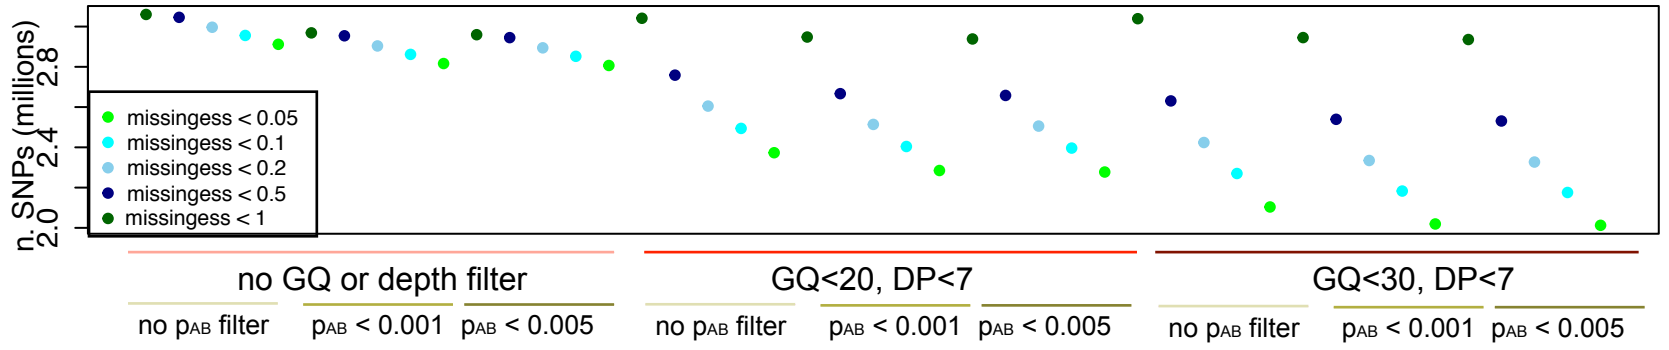

## Number of indels

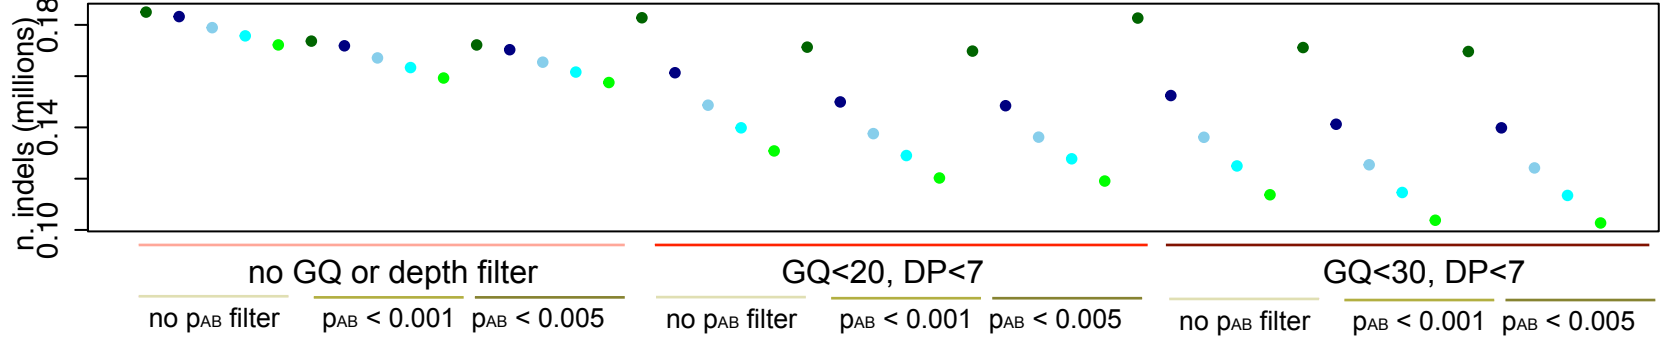

## Mendelian error rate for SNPs

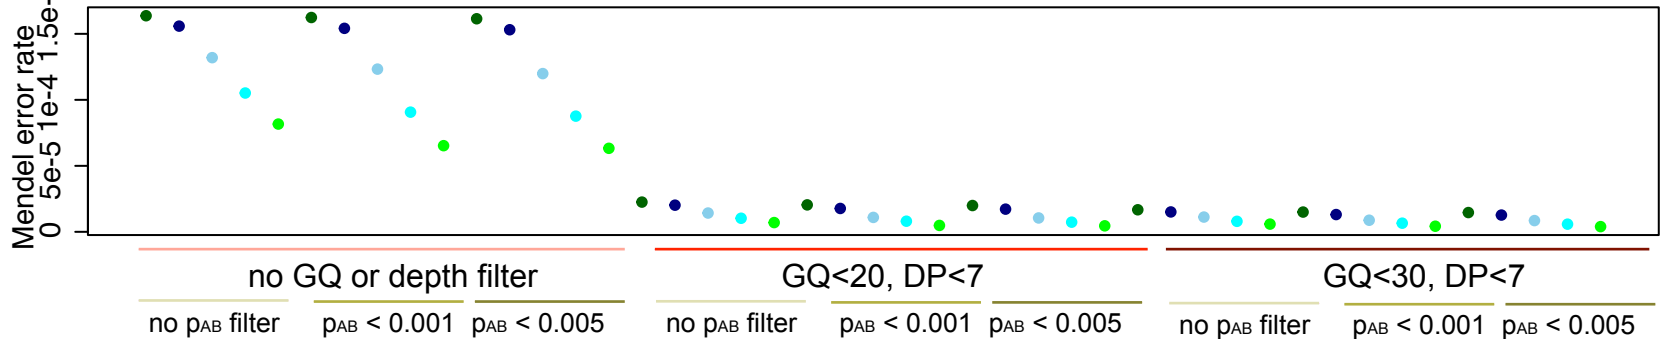

## Mendelian error rate for indels

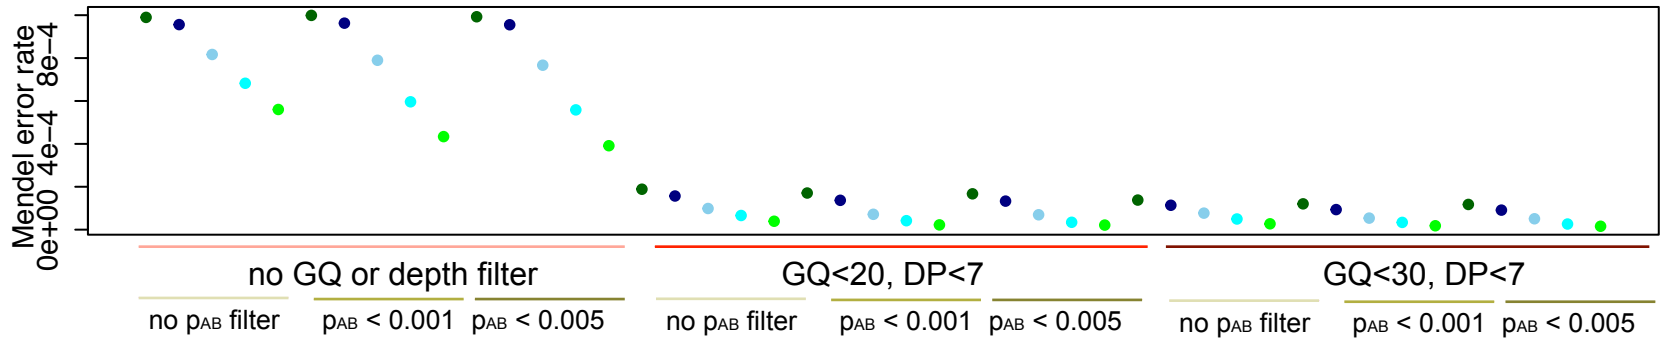

## Ti/Tv

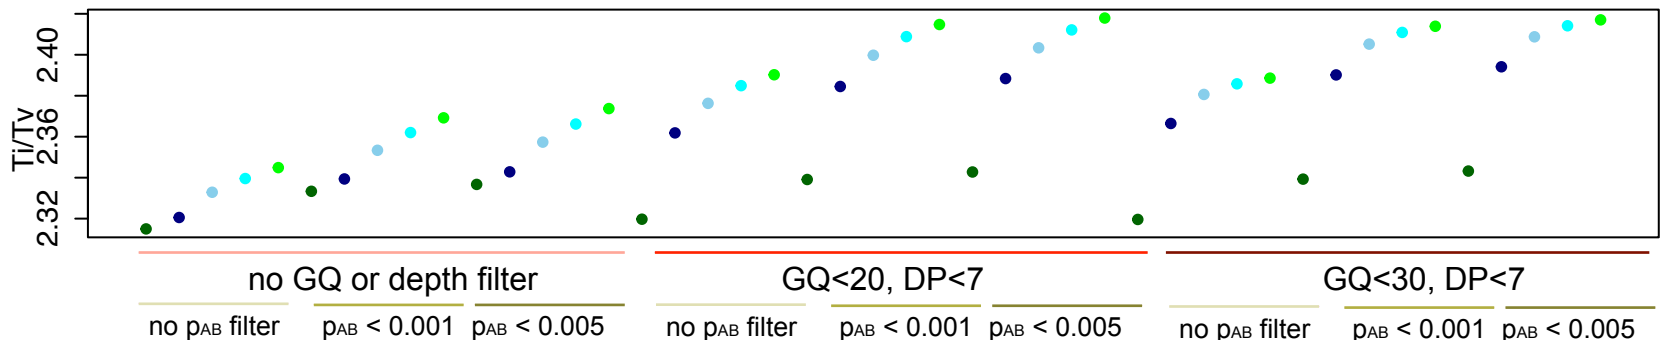

Supplement: EMS84140-supplement-Supp_Figure_20.pdf [file EMS84140-supplement-Supp_Figure_20.pdf]
