# Supplementary material
Source: PubMed Central journal article supplement (PMC6726470)

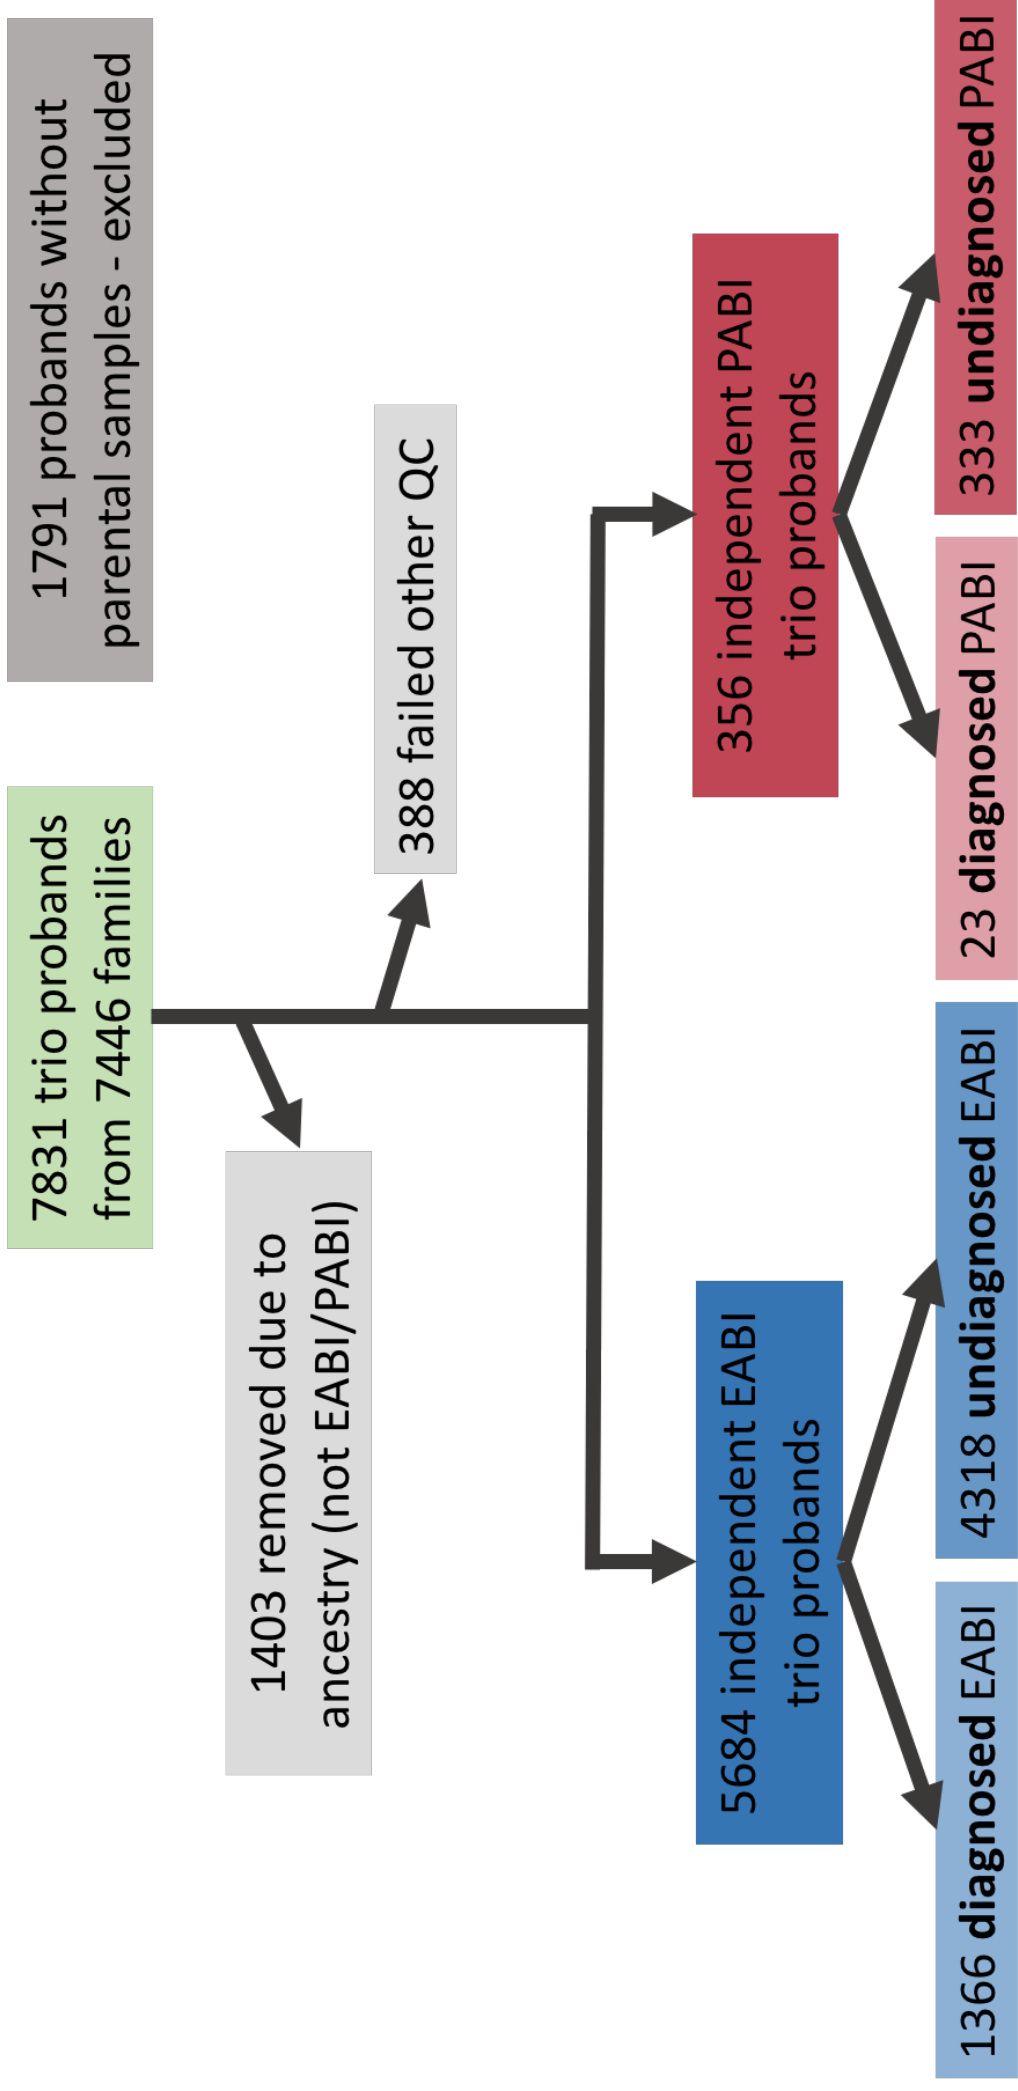

Supplement: EMS84140-supplement-Supp_Figure_1.pdf [file EMS84140-supplement-Supp_Figure_1.pdf]

Culture 1

Culture 2

WT1

WT2

HET1

HET2

HOM1

HOM2

WT1

HET1

HET2

HOM1

HOM2

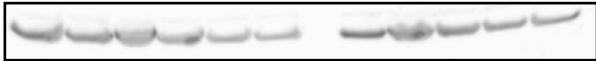

EIF3F

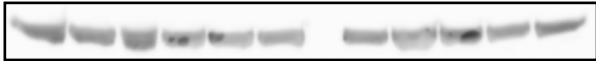

beta-tubulin

Supplement: EMS84140-supplement-Supp_Figure_10.pdf [file EMS84140-supplement-Supp_Figure_10.pdf]

**A**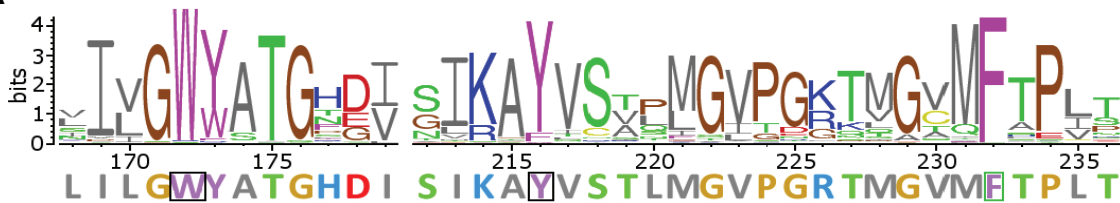**B**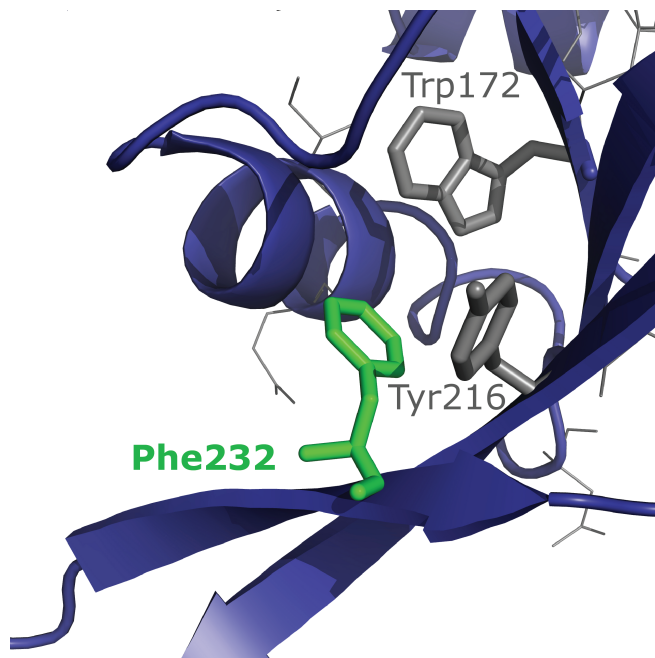

Supplement: EMS84140-supplement-Supp_Figure_11.pdf [file EMS84140-supplement-Supp_Figure_11.pdf]

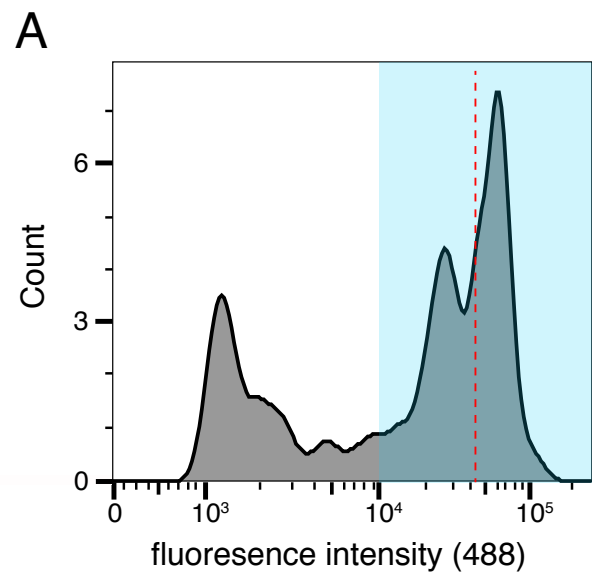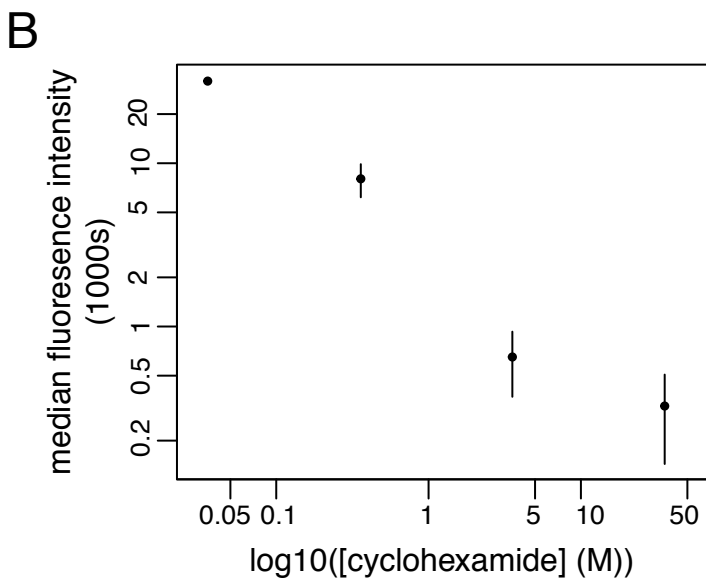

Supplement: EMS84140-supplement-Supp_Figure_12.pdf [file EMS84140-supplement-Supp_Figure_12.pdf]

**A**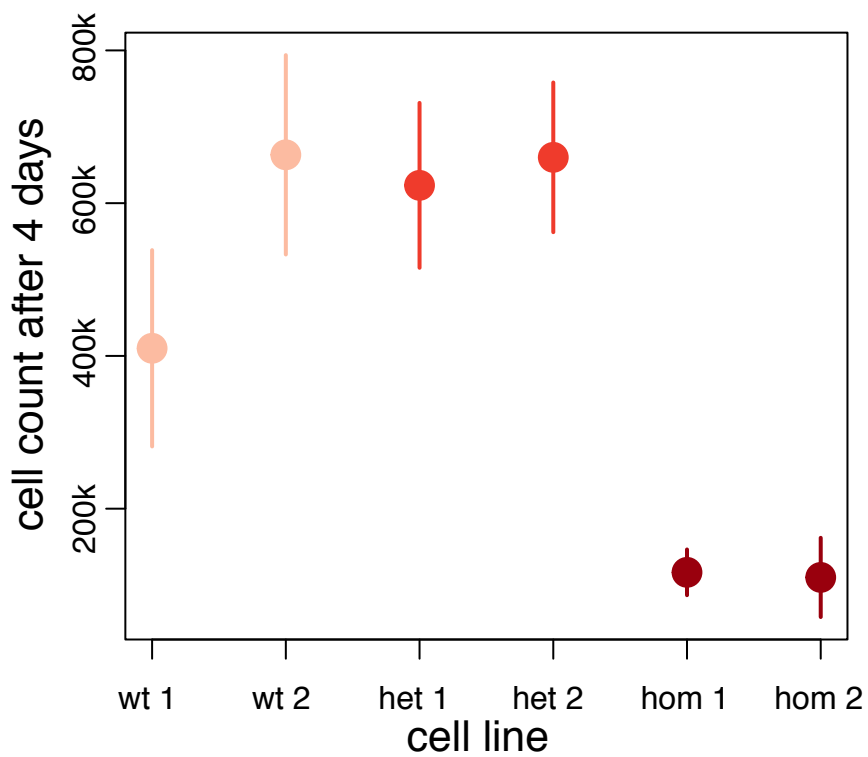**B**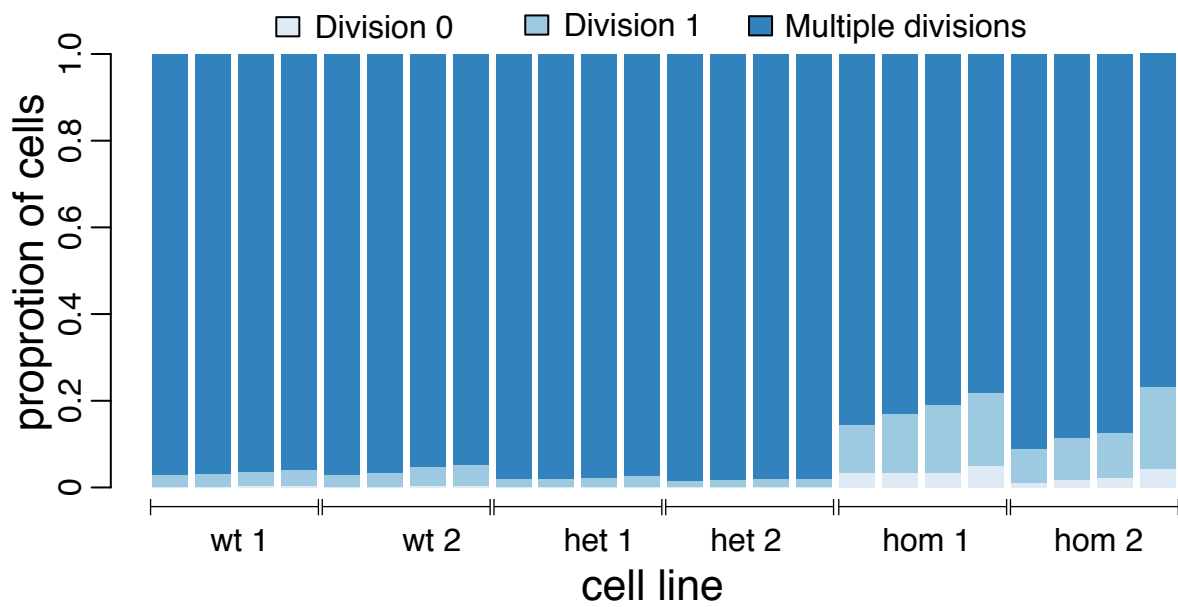

Supplement: EMS84140-supplement-Supp_Figure_13.pdf [file EMS84140-supplement-Supp_Figure_13.pdf]

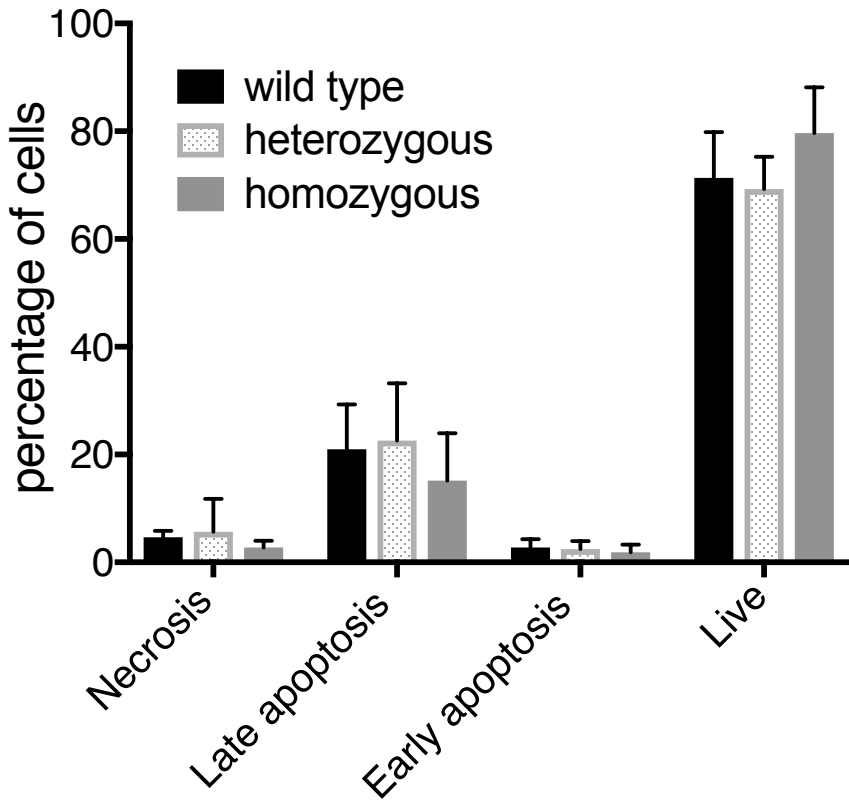

Supplement: EMS84140-supplement-Supp_Figure_14.pdf [file EMS84140-supplement-Supp_Figure_14.pdf]

# KDM5B

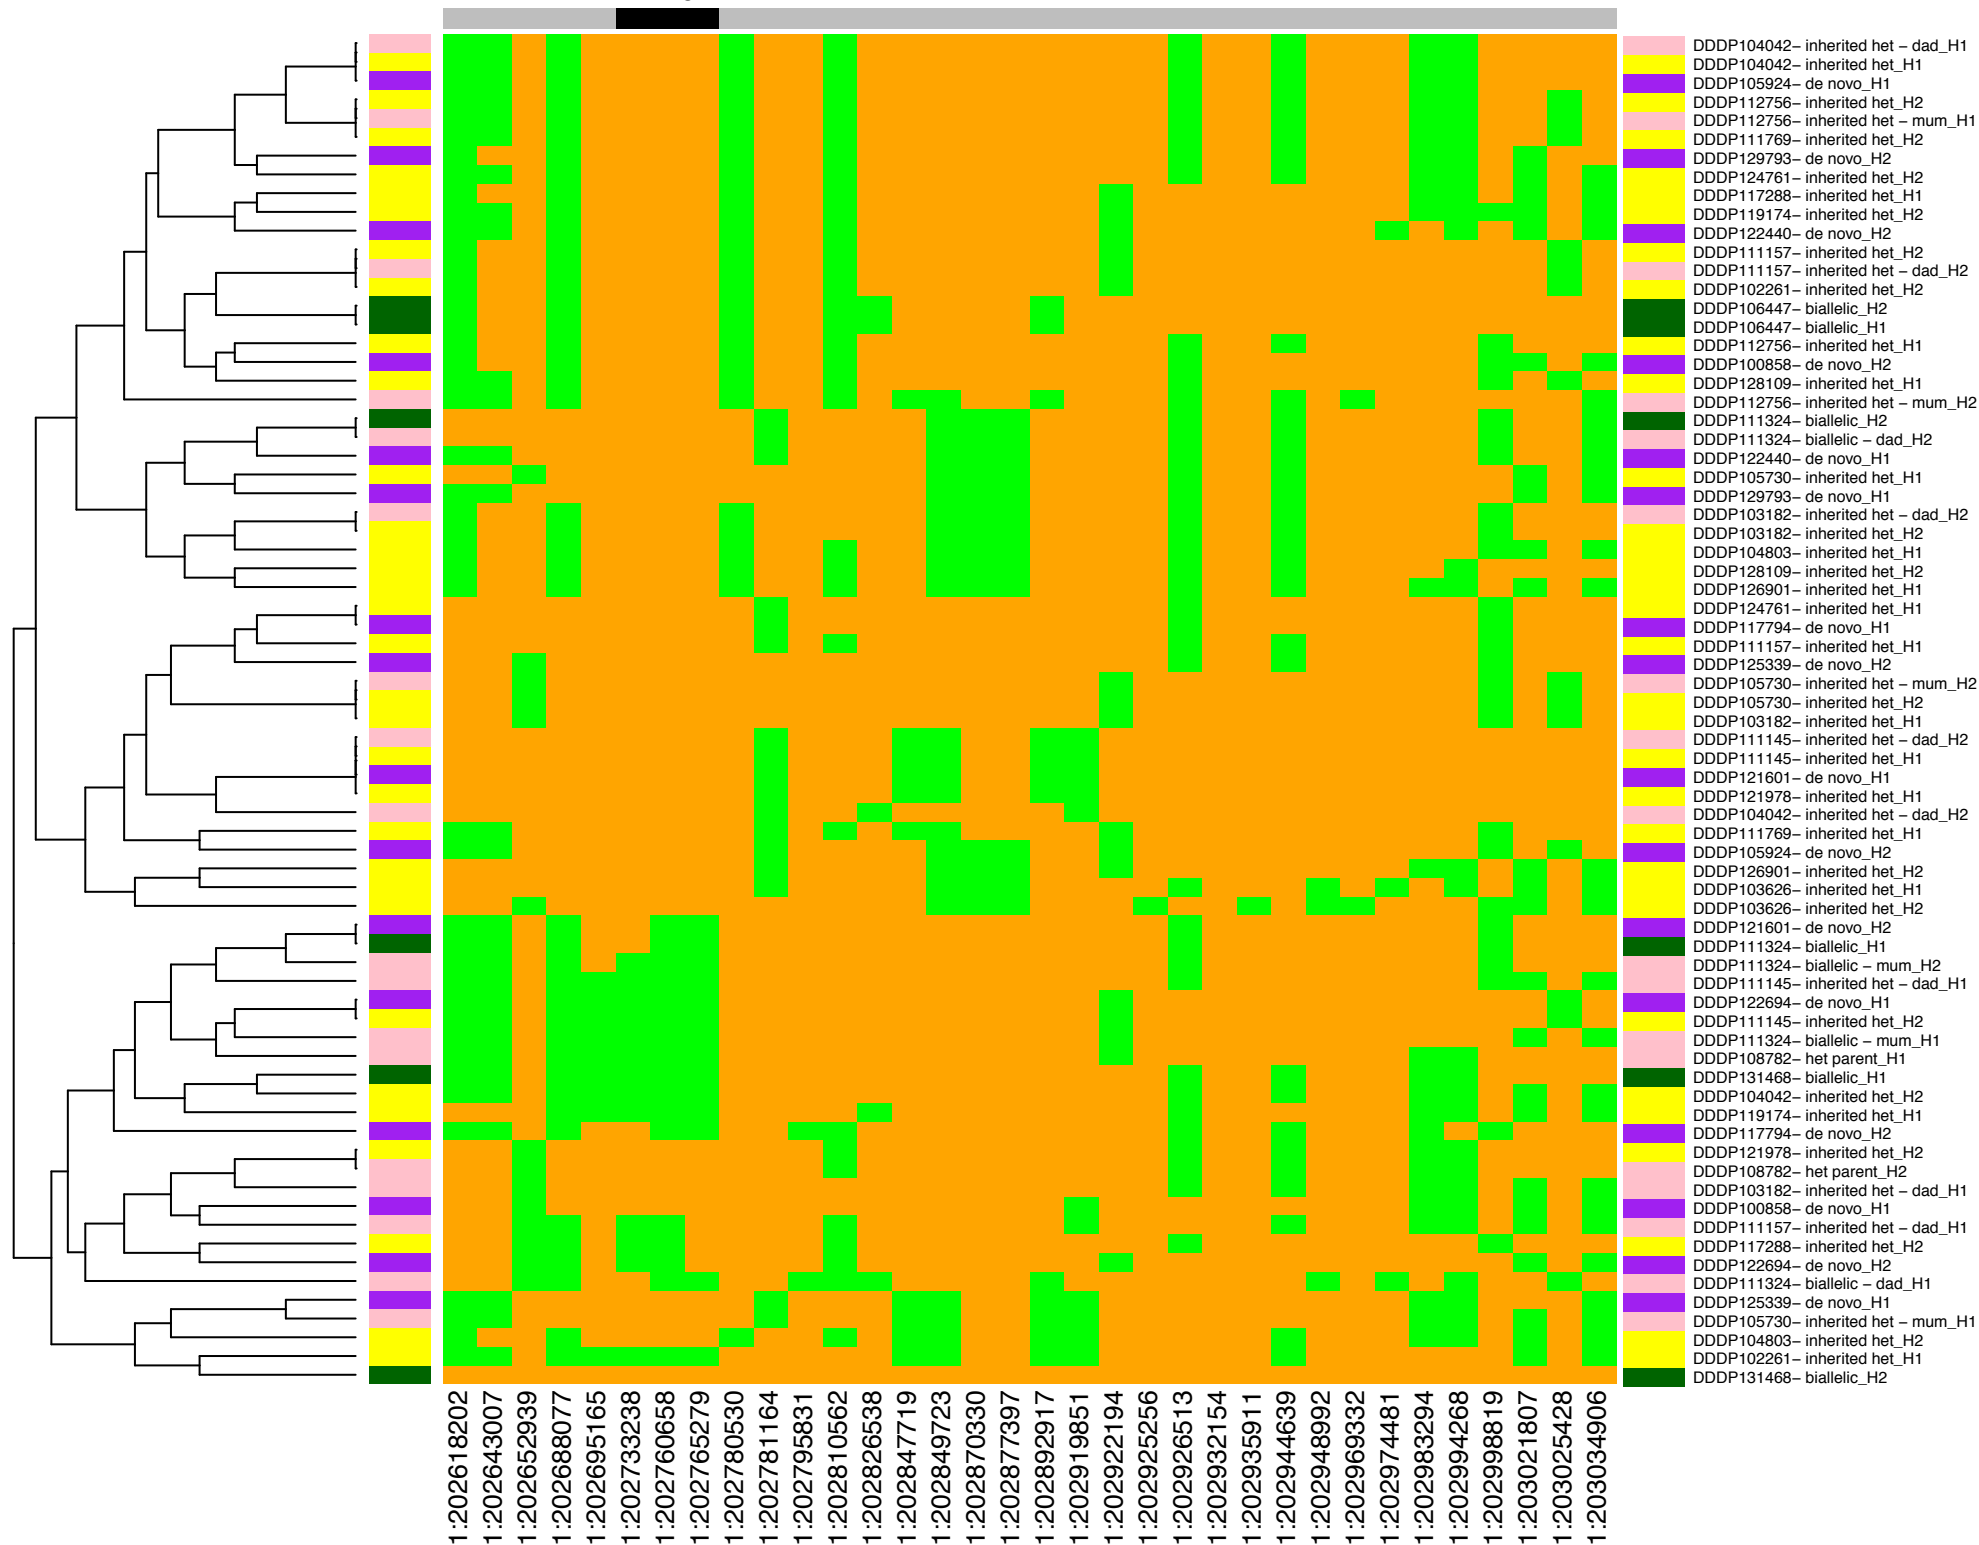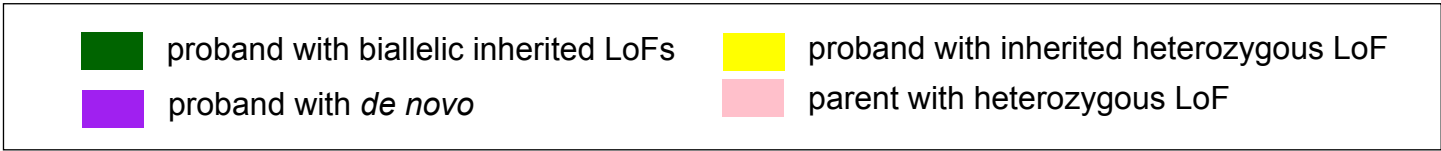

Supplement: EMS84140-supplement-Supp_Figure_15.pdf [file EMS84140-supplement-Supp_Figure_15.pdf]

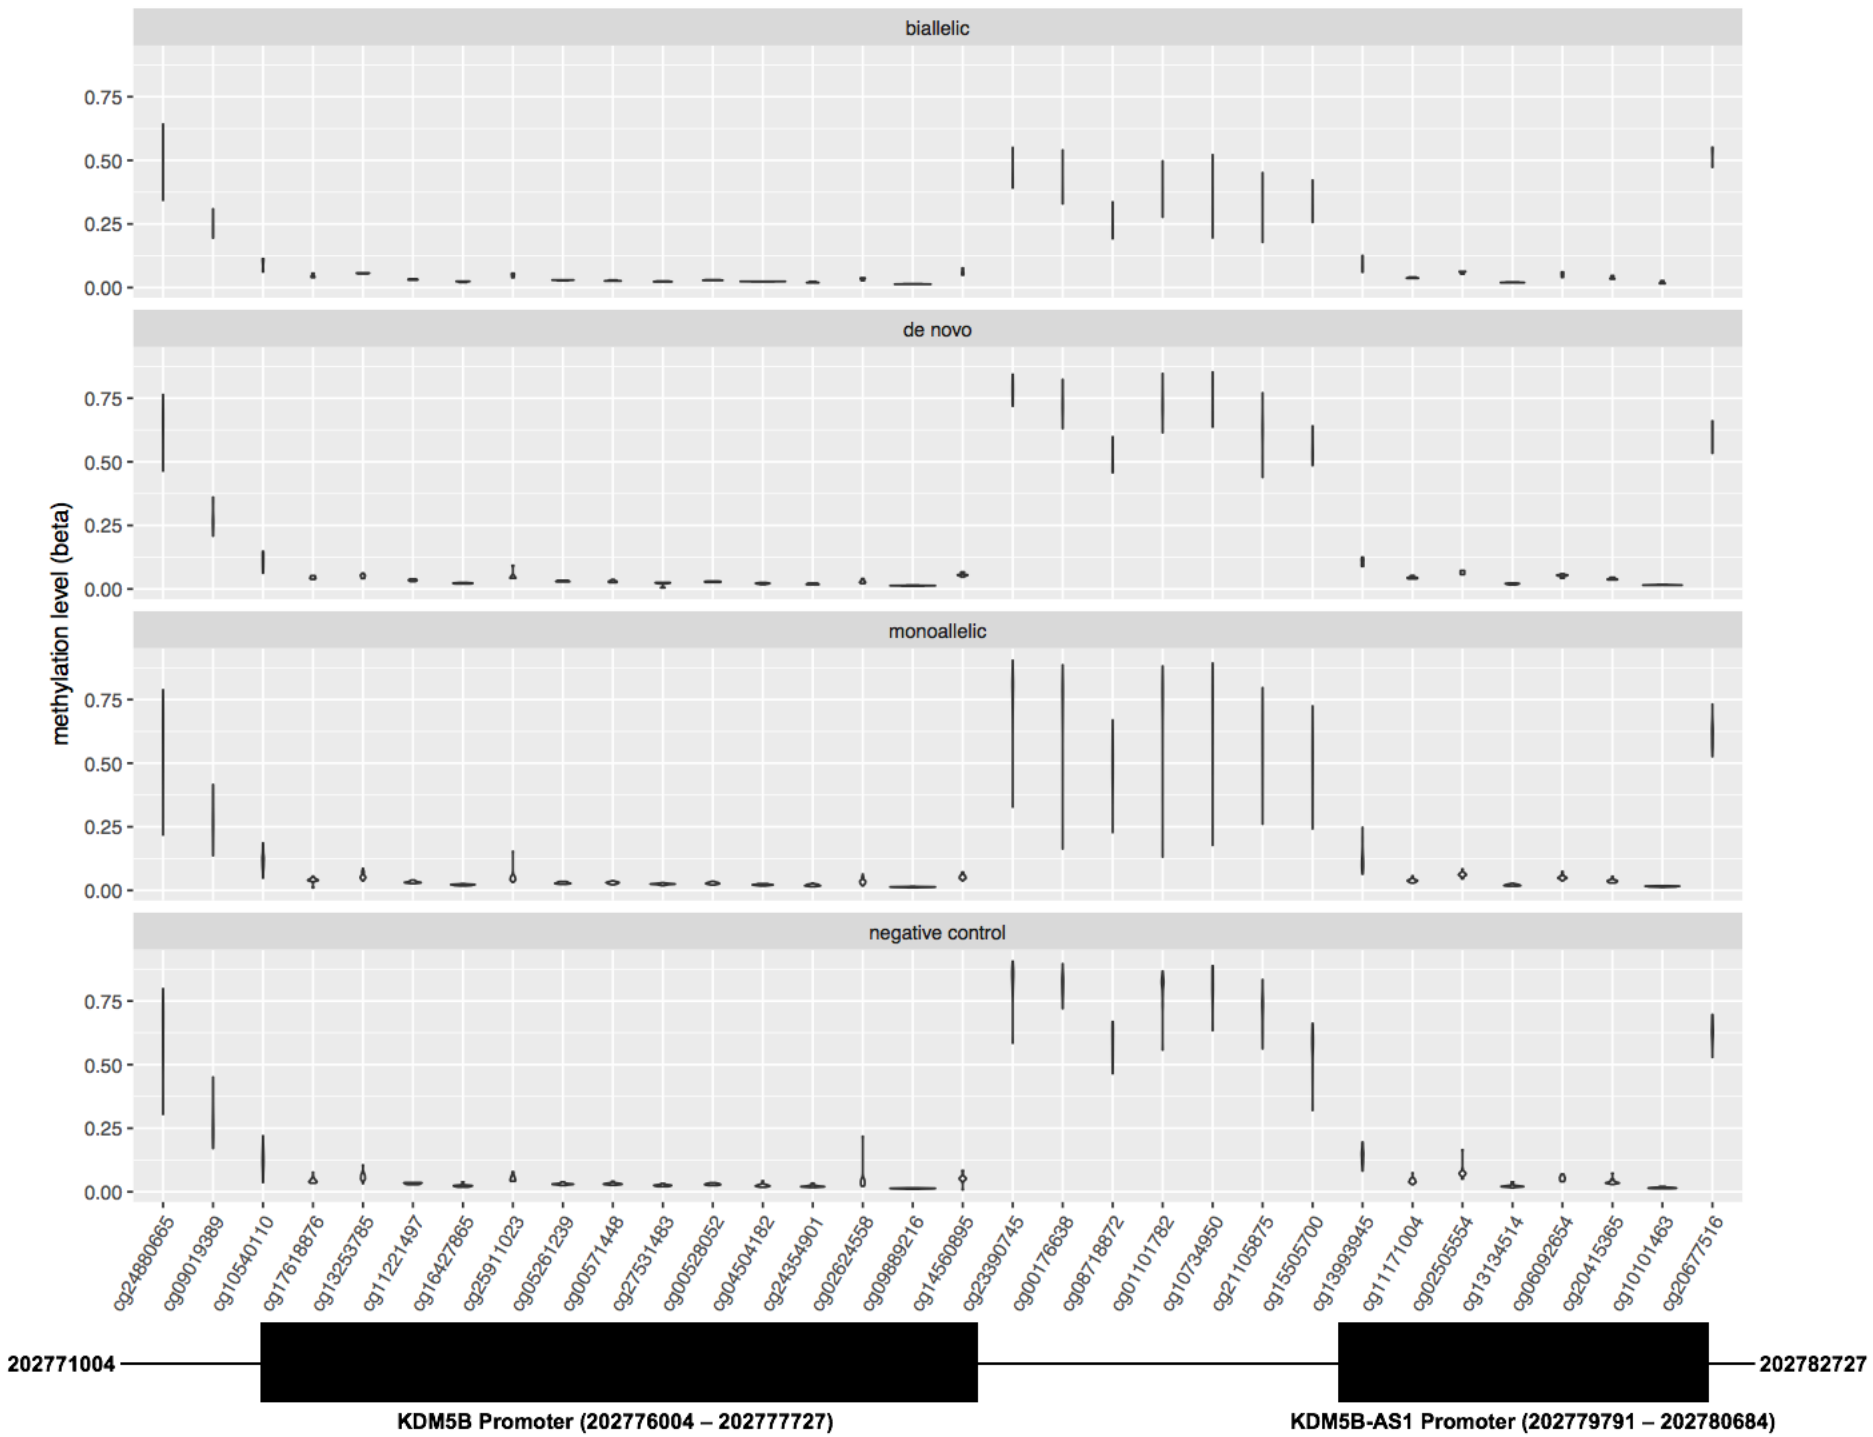

Supplement: EMS84140-supplement-Supp_Figure_16.pdf [file EMS84140-supplement-Supp_Figure_16.pdf]

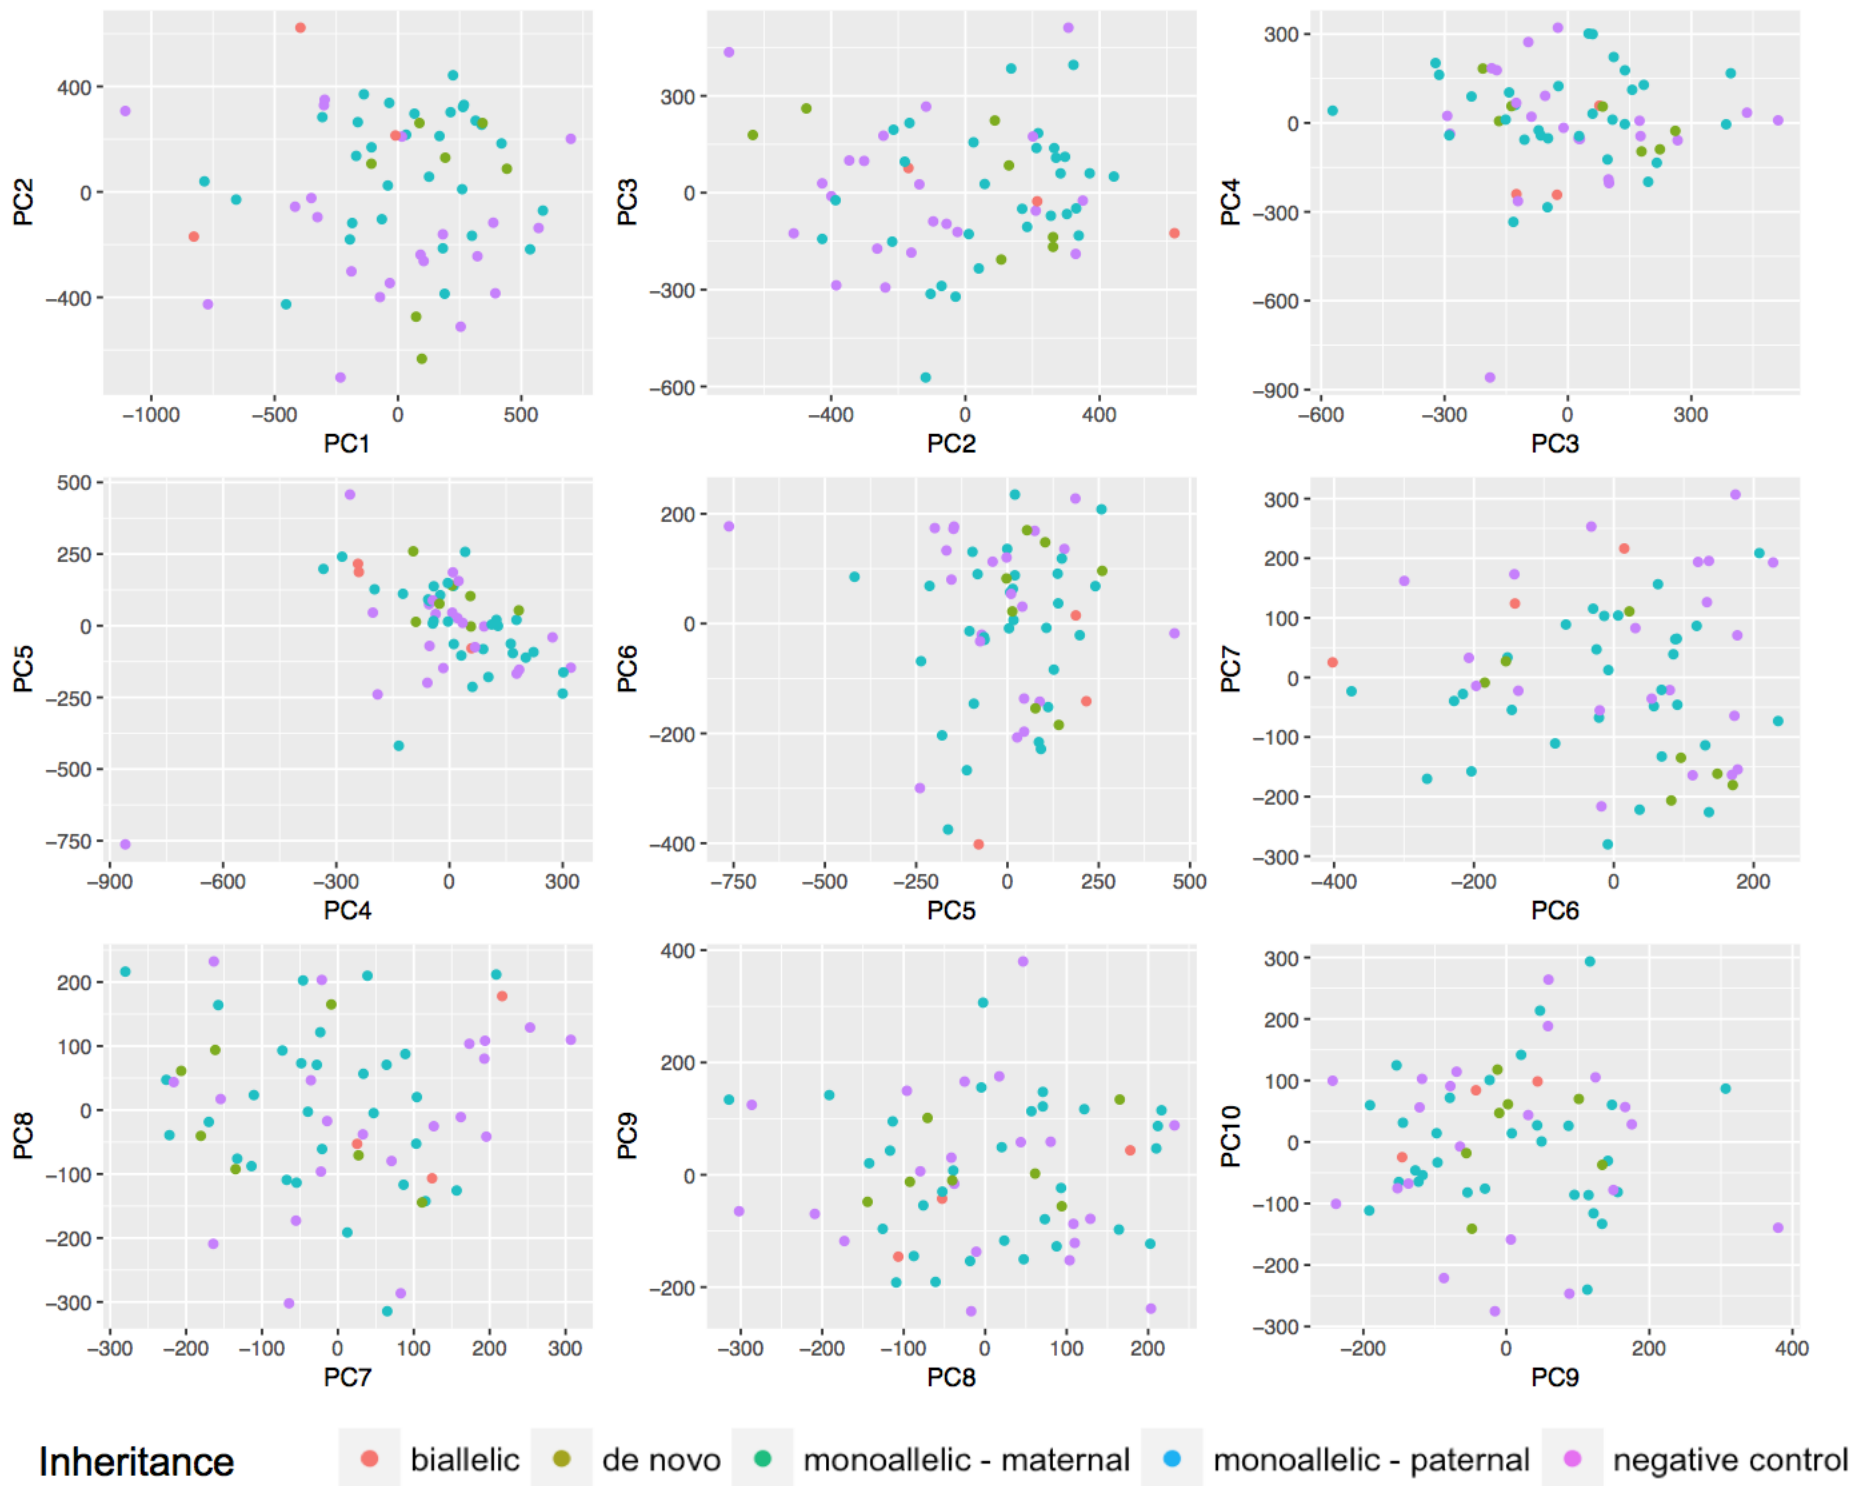

Supplement: EMS84140-supplement-Supp_Figure_17.pdf [file EMS84140-supplement-Supp_Figure_17.pdf]

264607

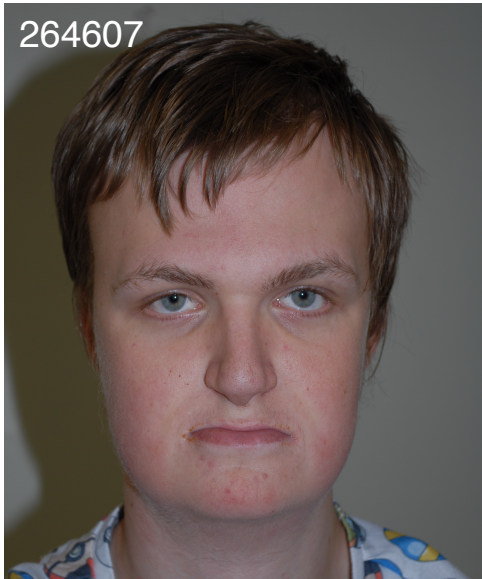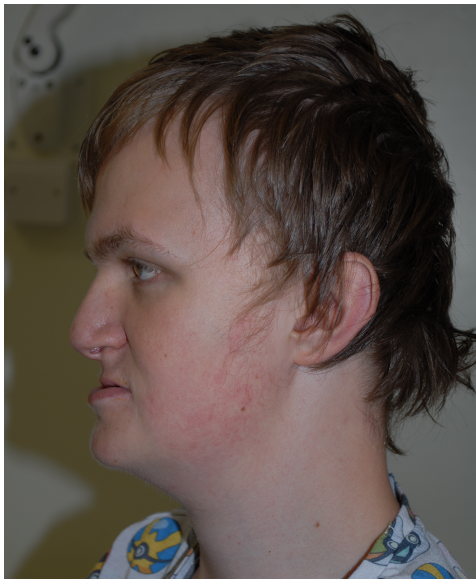

Supplement: EMS84140-supplement-Supp_Figure_18.pdf [file EMS84140-supplement-Supp_Figure_18.pdf]

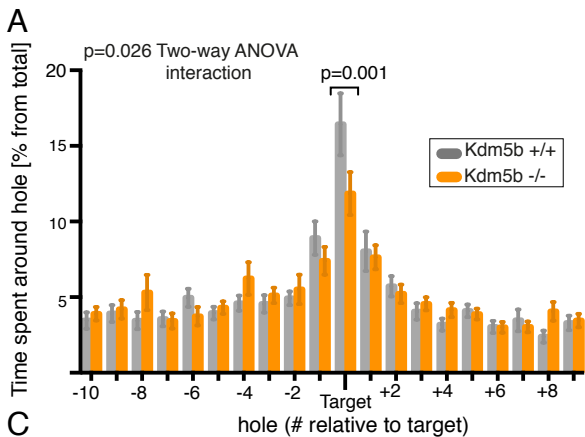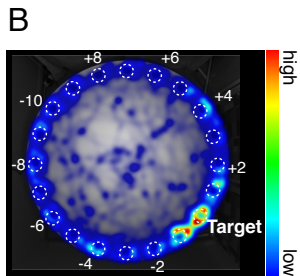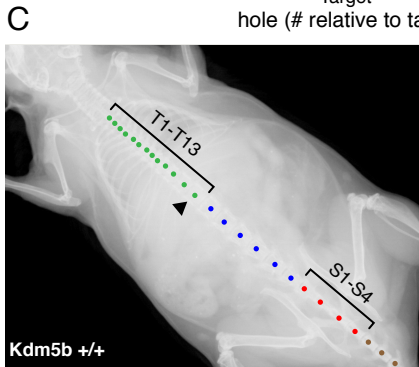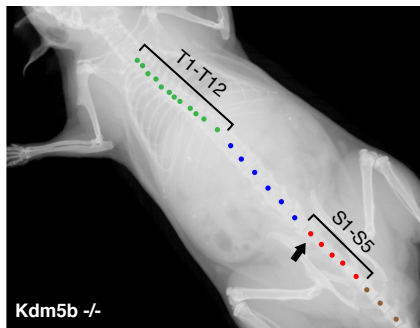

Supplement: EMS84140-supplement-Supp_Figure_19.pdf [file EMS84140-supplement-Supp_Figure_19.pdf]

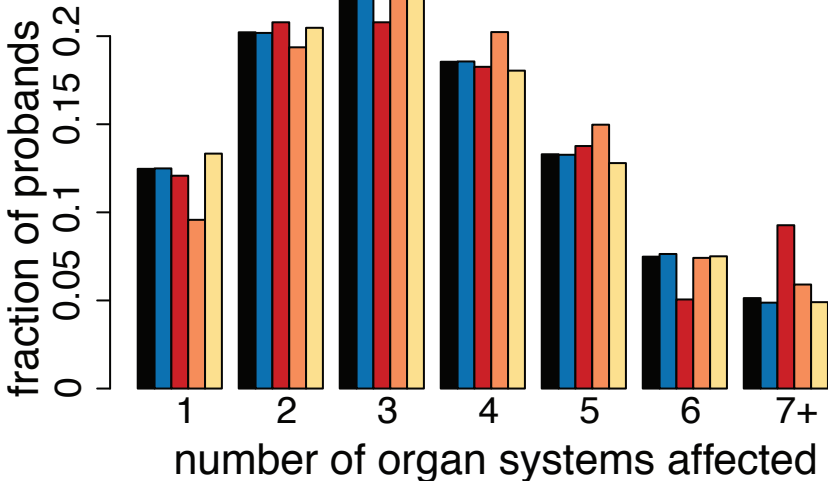

■ all; mean = 3.45

■ EABI; mean = 3.44 |  $p=0.4$

■ PABI; mean = 3.58

■ diagnosed; mean = 3.61

■ undiagnosed; mean = 3.40 |  $p=8 \times 10^{-5}$

Supplement: EMS84140-supplement-Supp_Figure_3.pdf [file EMS84140-supplement-Supp_Figure_3.pdf]

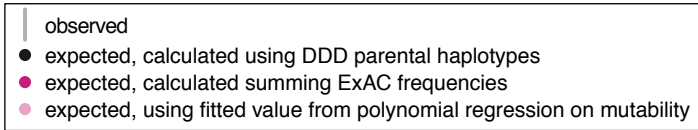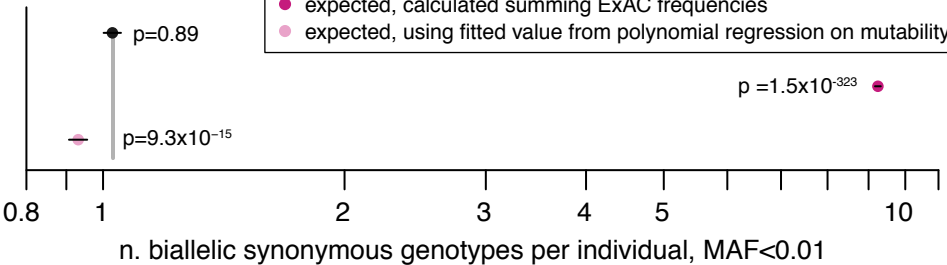

Supplement: EMS84140-supplement-Supp_Figure_4.pdf [file EMS84140-supplement-Supp_Figure_4.pdf]

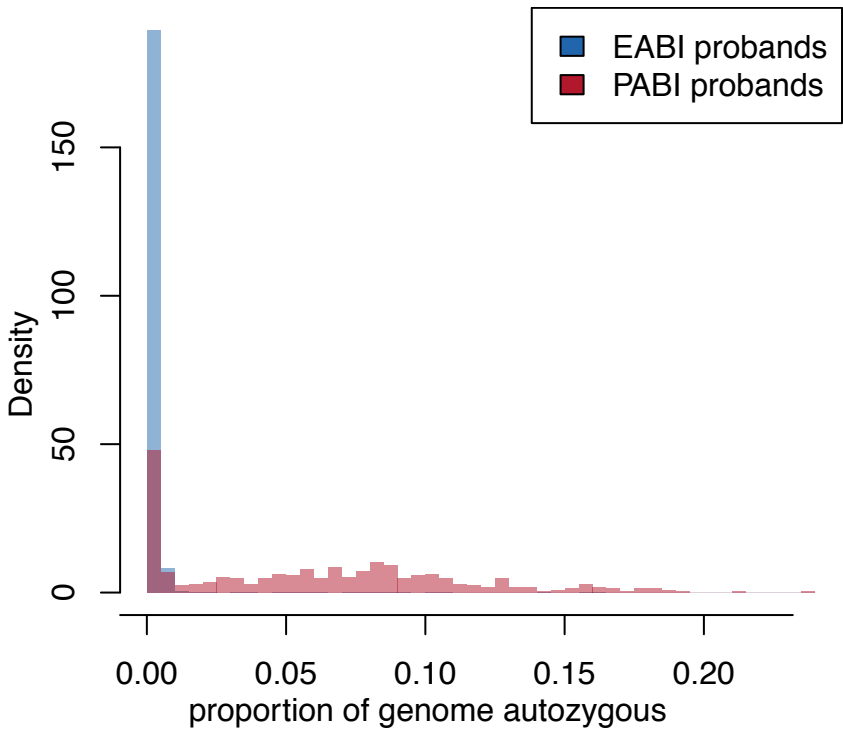

Supplement: EMS84140-supplement-Supp_Figure_5.pdf [file EMS84140-supplement-Supp_Figure_5.pdf]

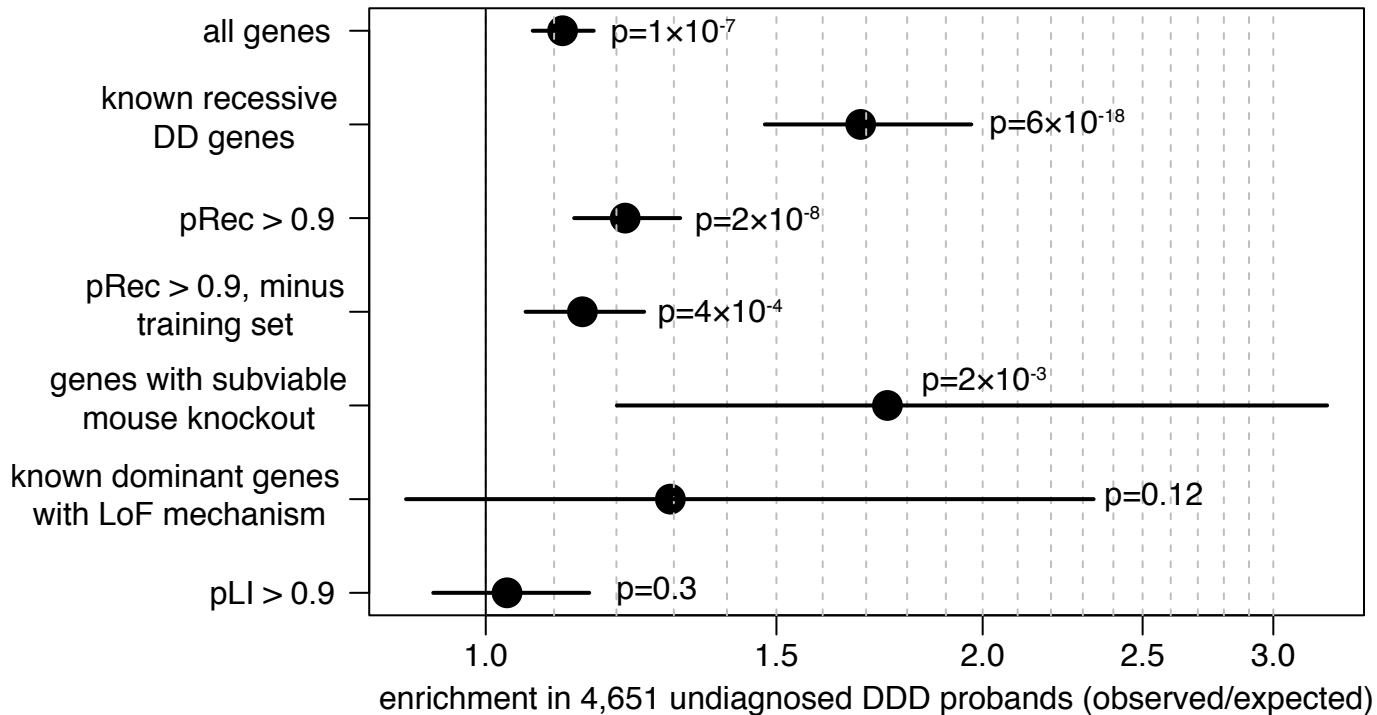

Supplement: EMS84140-supplement-Supp_Figure_6.pdf [file EMS84140-supplement-Supp_Figure_6.pdf]

### LoF/LoF

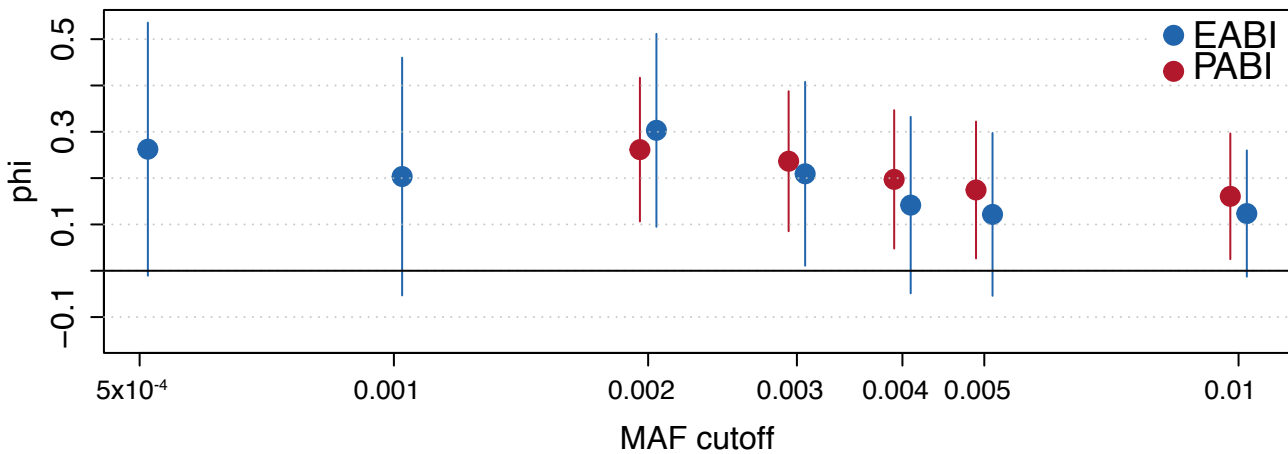

### LoF/damaging missense

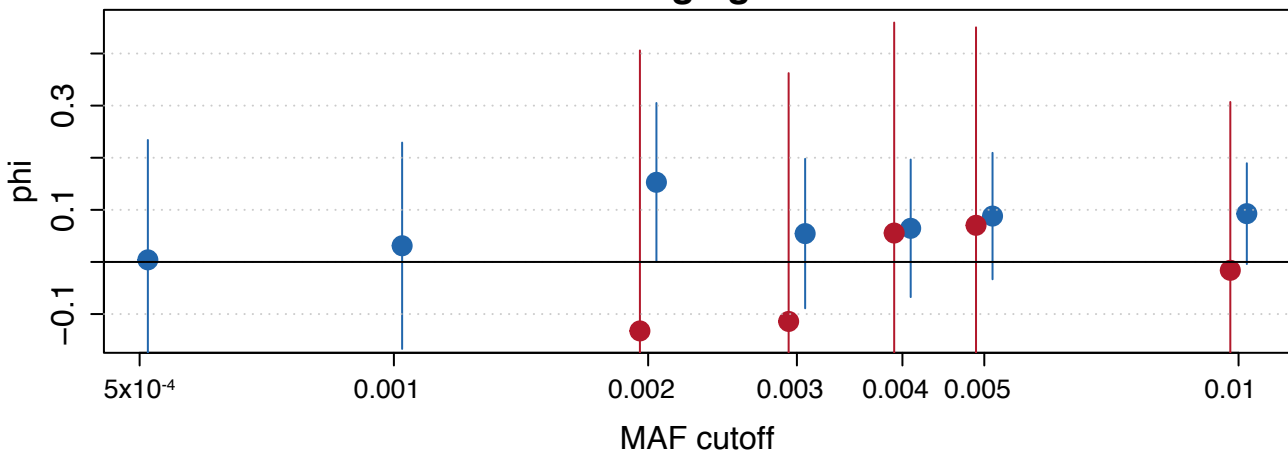

### damaging missense/damaging missense

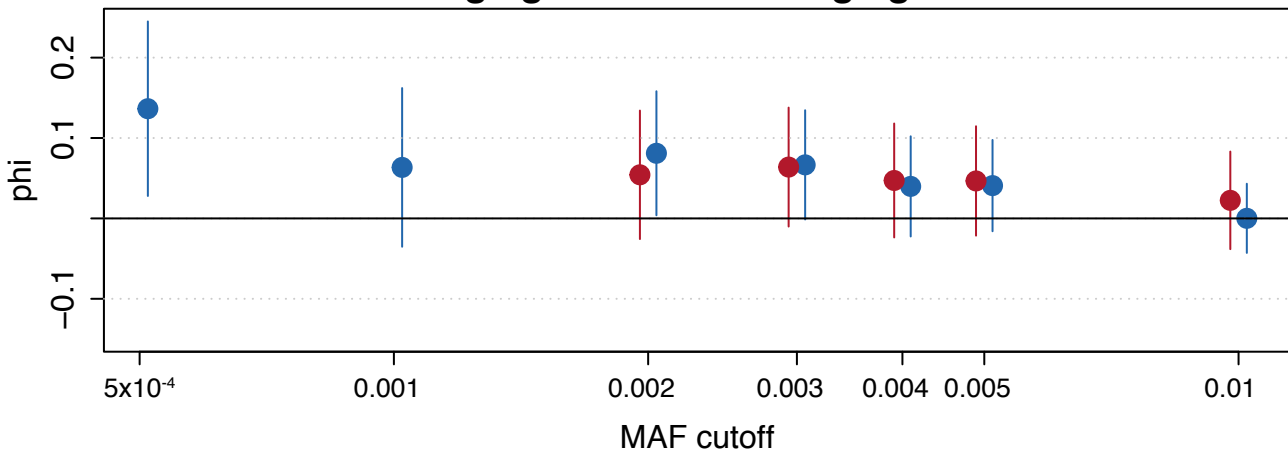

Supplement: EMS84140-supplement-Supp_Figure_7.pdf [file EMS84140-supplement-Supp_Figure_7.pdf]

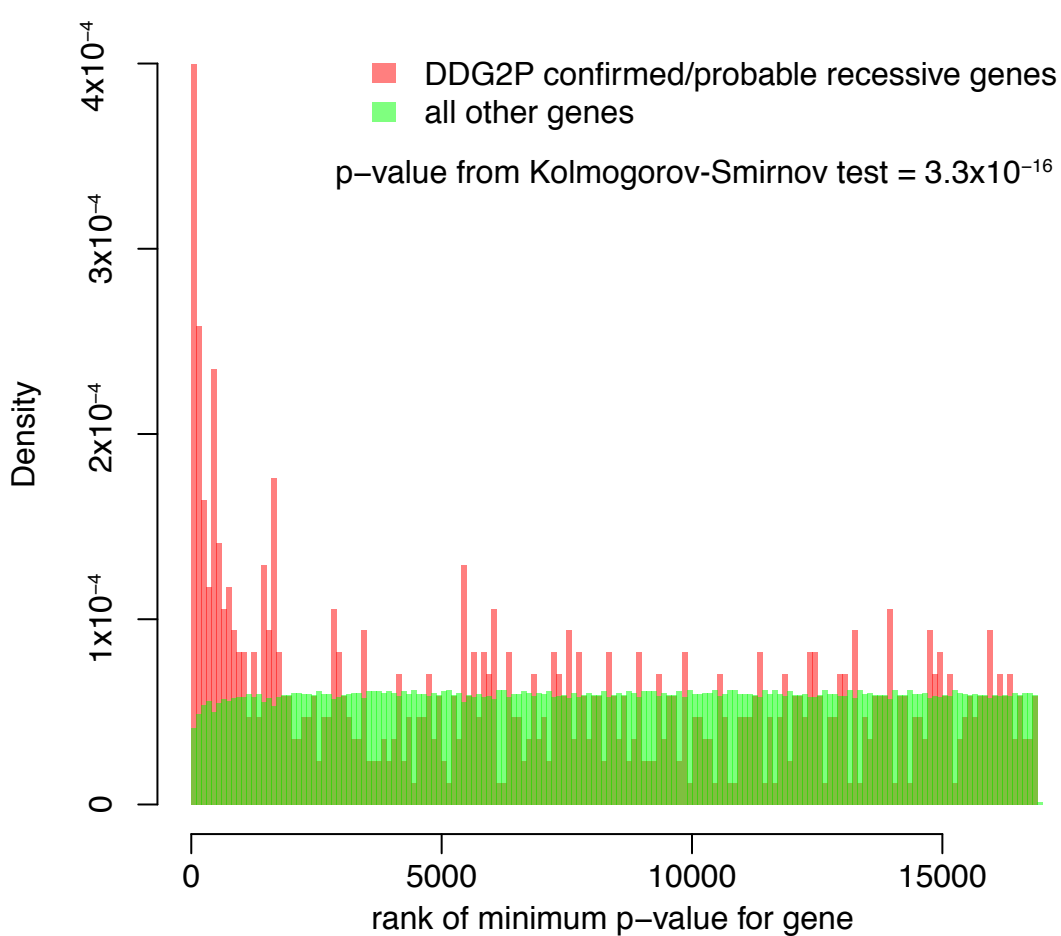

Supplement: EMS84140-supplement-Supp_Figure_8.pdf [file EMS84140-supplement-Supp_Figure_8.pdf]

265452

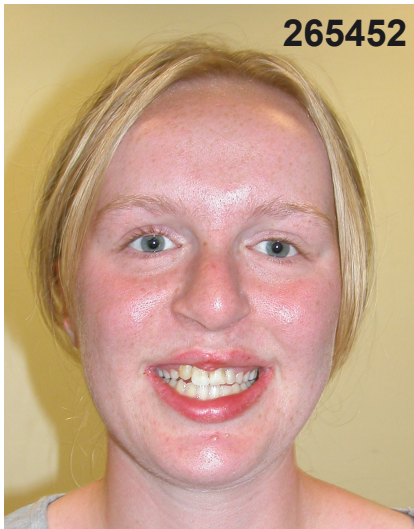

283926

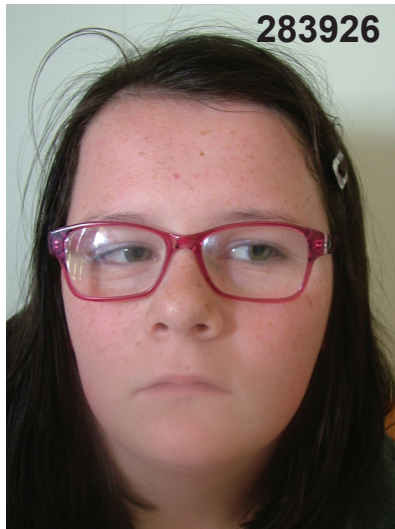

265452

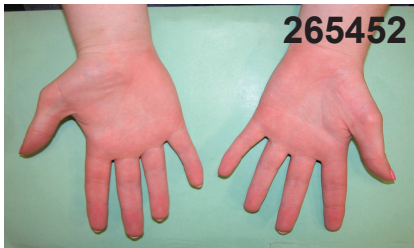

Supplement: EMS84140-supplement-Supp_Figure_9.pdf [file EMS84140-supplement-Supp_Figure_9.pdf]
